# Supplementary material
Source: PubMed Central journal article supplement (PMC363122)
Supplement: mbc_15_3_1262__1.pdf [file mbc_15_3_1262__1.pdf]

**Common genes regulated by estradiol and raloxifene**

| <b>Accession number</b> | <b>Gene</b>                                                                         |
|-------------------------|-------------------------------------------------------------------------------------|
| X97335                  | A kinase (PRKA) anchor protein 1                                                    |
| AL050025                | adaptor-related protein complex 1, gamma 1 subunit                                  |
| AB016811                | ADP-ribosylation factor-like 7                                                      |
| AF043129                | AF043129:untitled /cds=(0,1379)                                                     |
| L35594                  | autotaxin                                                                           |
| AF037335                | carbonic anhydrase XII                                                              |
| U67319                  | caspase 7, apoptosis-related cysteine protease                                      |
| AA151971                | cDNA clone IMAGE 588365                                                             |
| AA933984                | cDNA DKFZp564B222                                                                   |
| AL050173                | chromosome 21 open reading frame 25                                                 |
| M20469                  | clathrin, light polypeptide (Lcb)                                                   |
| AF038198                | clone 23928                                                                         |
| AF070632                | clone 24405                                                                         |
| Y07593                  | coxsackie virus and adenovirus receptor                                             |
| AI017574                | cysteine-rich protein 1 (intestinal)                                                |
| AF059611                | ectodermal-neural cortex (with BTB-like domain)                                     |
| M27826                  | endogenous retroviral protease                                                      |
| M14539                  | factor XIII subunit A                                                               |
| AF007139                | fibronectin leucine rich transmembrane protein 1                                    |
| M19481                  | follistatin                                                                         |
| AF032885                | forkhead protein                                                                    |
| U29332                  | four and a half LIM domains 2                                                       |
| AJ011001                | G protein-coupled receptor 56                                                       |
| AF062534                | genethonin 1                                                                        |
| AF023466                | glycine-N-acyltransferase                                                           |
| D86962                  | growth factor receptor-bound protein 10                                             |
| D87119                  | GS3955 protein                                                                      |
| L13436                  | guanylate cyclase                                                                   |
| AI200373                | H2A histone family, member I                                                        |
| AF054589                | HIC protein                                                                         |
| AA522530                | hypothetical protein                                                                |
| M62403                  | insulin-like growth factor-binding protein 4                                        |
| U88964                  | interferon stimulated gene (20kD)                                                   |
| M29696                  | interleukin 7 receptor                                                              |
| M28225                  | JE gene encoding a monocyte secretory protein                                       |
| AB020685                | KIAA0878 protein                                                                    |
| AB023227                | KIAA1010 protein                                                                    |
| AJ001683                | killer cell lectin-like receptor subfamily C, member 4                              |
| U43328                  | link protein (cartilage linking protein 1)                                          |
| L23808                  | matrix metalloproteinase 12 (macrophage elastase)                                   |
| AB018342                | myosin X                                                                            |
| M32011                  | neutrophil oxidase factor (p67-phox)                                                |
| M69043                  | nuclear factor of kappa light polypeptide gene enhancer in B-cells inhibitor, alpha |
| tigr:HG4679-<br>HT5104  | Oncogene Ret/Ptc, Fusion Activated                                                  |
| tigr:HG4677-<br>HT5102  | Oncogene Ret/Ptc2, Fusion Activated                                                 |
| U30521                  | P311 protein                                                                        |

|                  |                                                                                           |
|------------------|-------------------------------------------------------------------------------------------|
| AB023209         | palladin                                                                                  |
| AF022797         | potassium intermediate/small conductance calcium-activated channel, subfamily N, member 4 |
| Y17169           | protein tyrosine kinase 9-like (A6-related protein)                                       |
| S62035           | Ras protein-specific guanine nucleotide-releasing factor 1                                |
| AF030107         | regulator of G-protein signalling 13                                                      |
| D86988           | regulator of nonsense transcripts 1                                                       |
| U73167           | sema domain, immunoglobulin domain (Ig), short basic domain, secreted, (semaphorin) 3B    |
| M26683           | small inducible cytokine A2 (monocyte chemotactic protein 1, homologous to mouse Sig-je)  |
| AF004841         | surface glycoprotein, Ig superfamily member                                               |
| AF050110         | TGFB inducible early growth response                                                      |
| AA704137         | Thy-1 cell surface antigen                                                                |
| M19154           | transforming growth factor, beta 2                                                        |
| AF049910         | transforming, acidic coiled-coil containing protein 1                                     |
| M55153           | transglutaminase                                                                          |
| M77016           | tropomodulin                                                                              |
| tigr:HG620-HT620 | Tyrosine Phosphatase, Epsilon                                                             |
| M34309           | v-erb-b2 avian erythroblastic leukemia viral oncogene homolog 3                           |
| AL021977         | v-maf musculoaponeurotic fibrosarcoma (avian) oncogene family, protein F                  |
| M92843           | zinc finger transcriptional regulator                                                     |

#### Unique genes regulated by estradiol, but not raloxifene

| Accession number | Gene                                                               |
|------------------|--------------------------------------------------------------------|
| D31883           | actin binding LIM protein 1                                        |
| Y10183           | activated leucocyte cell adhesion molecule                         |
| U02390           | adenylyl cyclase-associated protein 2                              |
| X97324           | adipose differentiation-related protein                            |
| M80899           | AHNAK nucleoprotein (desmoyokin)                                   |
| X05409           | aldehyde dehydrogenase 2 family (mitochondrial)                    |
| X01683           | alpha-1 antitrypsin                                                |
| AF002282         | alpha-actinin-2-associated LIM protein                             |
| K02215           | angiotensinogen                                                    |
| N74607           | aquaporin 3                                                        |
| AF091242         | ATP sulfurylase/APS kinase 2                                       |
| U78735           | ATP-binding cassette, sub-family A (ABC1), member 3                |
| X83467           | ATP-binding cassette, sub-family D (ALD), member 3                 |
| U45878           | baculoviral IAP repeat-containing 3                                |
| AB006757         | BH-protocadherin (brain-heart)                                     |
| U43842           | bone morphogenetic protein 4                                       |
| M60314           | bone morphogenetic protein 5                                       |
| X56667           | calbindin 2, (29kD, calretinin)                                    |
| AF038852         | calcium channel, voltage-dependent, beta 4 subunit                 |
| U66063           | calcium/calmodulin-dependent protein kinase (CaM kinase) II gamma  |
| J03037           | carbonic anhydrase II                                              |
| X51405           | carboxypeptidase E                                                 |
| M83667           | CCAAT/enhancer binding protein (C/EBP), delta                      |
| AB015629         | CD209 antigen-like                                                 |
| Z11697           | CD83 antigen (activated B lymphocytes, immunoglobulin superfamily) |
| AI222594         | cDNA clone IMAGE 1839416                                           |

|                    |                                                                                  |
|--------------------|----------------------------------------------------------------------------------|
| AL080192           | cDNA DKFZp434B102                                                                |
| AL049250           | cDNA DKFZp564D113                                                                |
| AL049941           | cDNA DKFZp564E2222                                                               |
| AL050227           | cDNA DKFZp586M0723                                                               |
| W26667             | cDNA FLJ14821 fis, clone OVARC1000556                                            |
| AA156240           | cDNA: FLJ22182 fis, clone HRC00953                                               |
| AB007969           | chromosome 1 specific transcript KIAA0500                                        |
| M82882             | cis-acting sequence                                                              |
| X81637             | clathrin light chain b                                                           |
| U79293             | clone 23948                                                                      |
| L25286             | collagen, type XV, alpha 1                                                       |
| X78947             | connective tissue growth factor                                                  |
| U04636             | cyclooxygenase-2                                                                 |
| X70377             | cystatin D                                                                       |
| AI017574           | cysteine-rich protein 1 (intestinal)                                             |
| X13589             | cytochrome P450, subfamily XIX (aromatization of androgens)                      |
| Y17282             | cytokeratin type II                                                              |
| AB007860           | development and differentiation enhancing factor 2                               |
| AL080156           | DKFZP434J214 protein                                                             |
| AL050024           | DKFZP564D206 protein                                                             |
| AA143321           | DKFZP586M1523 protein                                                            |
| X68277             | dual specificity phosphatase 1                                                   |
| AI810807           | dynein, cytoplasmic, intermediate polypeptide 1                                  |
| U80811             | endothelial differentiation, lysophosphatidic acid G-protein-coupled receptor, 2 |
| L36645             | EphA4                                                                            |
| L25879             | epoxide hydrolase 1, microsomal (xenobiotic)                                     |
| W28438             | ESTs                                                                             |
| M55267             | EV12 protein                                                                     |
| D88308             | fatty-acid-Coenzyme A ligase, very long-chain 1                                  |
| M87770             | fibroblast growth factor receptor (K-sam)                                        |
| AB007865           | fibronectin leucine rich transmembrane protein 2                                 |
| M88279             | FK506-binding protein 4 (59kD)                                                   |
| AB011126           | formin-binding protein 17                                                        |
| L37882             | frizzled (Drosophila) homolog 2                                                  |
| AB017365           | frizzled (Drosophila) homolog 7                                                  |
| AF056085           | G protein-coupled receptor 51                                                    |
| U10991             | G2 protein                                                                       |
| AB007296           | GLI-Kruppel family member GLI2                                                   |
| AI703188           | G-protein coupled receptor                                                       |
| L13698             | growth arrest-specific 1                                                         |
| U19523             | GTP cyclohydrolase 1 (dopa-responsive dystonia)                                  |
| tigr:HG1103-HT1103 | Guanine Nucleotide-Binding Protein Ral, Ras-Oncogene Related                     |
| U70370             | hindlimb expressed homeobox protein backfoot (Bft)                               |
| U54804             | hyaluronan synthase 2                                                            |
| U05659             | hydroxysteroid (17-beta) dehydrogenase 3                                         |
| L27560             | insulin-like growth factor binding protein                                       |
| M65062             | insulin-like growth factor binding protein 5                                     |
| M62402             | insulin-like growth factor binding protein 6                                     |
| X58377             | interleukin 11                                                                   |
| AF031167           | interleukin 15                                                                   |

|                    |                                                                                        |
|--------------------|----------------------------------------------------------------------------------------|
| M17017             | interleukin 8                                                                          |
| X56681             | jun D proto-oncogene                                                                   |
| M20812             | kappa-immunoglobulin germline pseudogene (cos118) variable region (subgroup V kappa I) |
| X07696             | keratin 15                                                                             |
| Y00503             | keratin 19                                                                             |
| AB002352           | KIAA0354 gene product                                                                  |
| AB002366           | KIAA0368 protein                                                                       |
| AB007916           | KIAA0447 gene product                                                                  |
| AB007940           | KIAA0471 gene product                                                                  |
| AB011147           | KIAA0575 gene product                                                                  |
| AB018347           | KIAA0804 protein                                                                       |
| AB023158           | KIAA0941 protein                                                                       |
| AB023169           | KIAA0952 protein                                                                       |
| AB028957           | KIAA1034 protein                                                                       |
| AB029025           | KIAA1102 protein                                                                       |
| S78569             | laminin, alpha 4                                                                       |
| M15856             | lipoprotein lipase                                                                     |
| AD000684           | liver-specific bHLH-Zip transcription factor                                           |
| L16895             | lysyl oxidase                                                                          |
| U68019             | MAD (mothers against decapentaplegic, Drosophila) homolog 3                            |
| U16261             | MDA-7 (interleukin 24)                                                                 |
| U71087             | mitogen-activated protein kinase kinase 5                                              |
| U72263             | multiple exostoses type II protein EXT2.I                                              |
| U67368             | multiple exostosis 2 (EXT2)                                                            |
| AA631972           | natural killer cell transcript 4                                                       |
| AJ011896           | Nef-associated factor 1                                                                |
| U79299             | neuroblastoma (nerve tissue) protein                                                   |
| X15306             | neurofilament, heavy polypeptide (200kD)                                               |
| X70991             | NGFI-A binding protein 2 (EGR1 binding protein 2)                                      |
| U08021             | nicotinamide N-methyltransferase                                                       |
| AA203138           | NPD009 protein                                                                         |
| U85193             | nuclear factor I/B                                                                     |
| X84373             | nuclear receptor interacting protein 1                                                 |
| X00737             | nucleoside phosphorylase                                                               |
| tigr:HG2724-HT2820 | Oncogene Tls/Chop, Fusion Activated                                                    |
| AB008822           | osteoclastogenesis inhibitory factor                                                   |
| AF012281           | PDZ domain containing 1                                                                |
| D90070             | phorbol-12-myristate-13-acetate-induced protein 1                                      |
| L20971             | phosphodiesterase 4B, cAMP-specific (dunce (Drosophila)-homolog phosphodiesterase E4)  |
| X97675             | plakophilin 2                                                                          |
| X02419             | plasminogen activator, urokinase                                                       |
| Z54367             | plectin 1, intermediate filament binding protein, 500kD                                |
| X00948             | prepro-relaxin H2                                                                      |
| U84573             | procollagen-lysine, 2-oxoglutarate 5-dioxygenase (lysine hydroxylase) 2                |
| Y07909             | Progression Associated Protein                                                         |
| D86096             | prostaglandin E receptor EP3 subtype                                                   |
| U47924             | protein "A"                                                                            |
| D87930             | protein phosphatase 1, regulatory (inhibitor) subunit 12A                              |
| X97198             | protein tyrosine phosphatase, receptor type, U                                         |
| U61836             | putative cyclin G1 interacting protein                                                 |

|          |                                                                                                                 |
|----------|-----------------------------------------------------------------------------------------------------------------|
| D38449   | putative G protein coupled receptor                                                                             |
| AB023061 | RAB36, member RAS oncogene family                                                                               |
| AL049538 | ras association (RalGDS/AF-6) domain containing protein JC265                                                   |
| AF117829 | receptor-interacting serine-threonine kinase 2                                                                  |
| AL050011 | retinoic acid induced 14                                                                                        |
| AF095448 | retinoic acid induced 3                                                                                         |
| M64936   | retinoic acid-inducible endogenous retroviral DNA                                                               |
| X00129   | retinol-binding protein 4, plasma                                                                               |
| D37931   | ribonuclease, RNase A family, 4                                                                                 |
| AB022663 | ring finger protein 14                                                                                          |
| S62138   | S62138:TLS/CHOP=hybrid gene {translocation breakpoint} [human, myxoid liposarcomas cells, mRNA Mutant, 1682 nt] |
| AA829286 | serum amyloid A1                                                                                                |
| AF059617 | serum-inducible kinase                                                                                          |
| A1337192 | SH3 domain binding glutamic acid-rich protein                                                                   |
| L13972   | sialyltransferase 4A (beta-galactosidase alpha-2,3-sialyltransferase)                                           |
| U43899   | signal transducing adaptor molecule (SH3 domain and ITAM motif) 1                                               |
| AB018249 | small inducible cytokine subfamily A (Cys-Cys), member 16                                                       |
| Y11251   | splicing factor, arginine/serine-rich 2, interacting protein                                                    |
| Z46629   | SRY (sex determining region Y)-box 9 (campomelic dysplasia, autosomal sex-reversal)                             |
| AF065389 | tetraspan 5                                                                                                     |
| X89750   | TGFB-induced factor (TALE family homeobox)                                                                      |
| L40387   | thyroid receptor interactor (TRIP14)                                                                            |
| U19261   | TNF receptor-associated factor 1                                                                                |
| U59863   | TRAF-interacting protein I-TRAF                                                                                 |
| D38305   | transducer of ERBB2, 1                                                                                          |
| X70340   | transforming growth factor, alpha                                                                               |
| U66061   | trypsinogen C                                                                                                   |
| X06956   | tubulin, alpha 1 (testis specific)                                                                              |
| M17589   | tyrosine hydroxylase                                                                                            |
| AA883502 | ubiquitin-conjugating enzyme E2L 6                                                                              |
| U41514   | UDP-N-acetyl-alpha-D-galactosamine:polypeptide N-acetylgalactosaminyltransferase 1 (GalNAc-T1)                  |
| Y09008   | uracil-DNA glycosylase                                                                                          |
| AF070523 | vitamin A responsive; cytoskeleton related                                                                      |
| AF100780 | WNT1 inducible signaling pathway protein 2 (WISP-2)                                                             |
| AF084481 | Wolfram syndrome 1 (wolframin)                                                                                  |
| Y09538   | zinc finger protein 185 (LIM domain)                                                                            |
| AA635153 | zinc finger protein 79 (pT7)                                                                                    |

#### Unique genes regulated by raloxifene, but not estradiol

| Accession number | Gene                                                   |
|------------------|--------------------------------------------------------|
| AJ225089         | 2'-5'-oligoadenylate synthetase-like                   |
| X57830           | 5-hydroxytryptamine receptor 2A                        |
| AB014511         | ATPase, Class II, type 9A                              |
| U66676           | ATP-binding cassette, sub-family B (MDR/TAP), member 9 |
| X91249           | ATP-binding cassette, sub-family G (WHITE), member 1   |
| AC004010         | BAC clone GS1-99H8                                     |
| AF042166         | beta-filamin                                           |

|          |                                                                                          |
|----------|------------------------------------------------------------------------------------------|
| AB006755 | BH-protocadherin (brain-heart)                                                           |
| X51801   | bone morphogenetic protein 7 (osteogenic protein 1)                                      |
| AB005298 | brain-specific angiogenesis inhibitor 2                                                  |
| M34064   | cadherin 2, type 1, N-cadherin (neuronal)                                                |
| M23254   | calpain 2, (m/II) large subunit                                                          |
| AL049851 | caspase recruitment domain protein 10                                                    |
| X52560   | CCAAT/enhancer binding protein (C/EBP), beta                                             |
| AL109724 | cDNA clone EUROIMAGE 417629                                                              |
| N90755   | cDNA clone IMAGE 302798                                                                  |
| AA532495 | cDNA clone IMAGE 996282                                                                  |
| AL080082 | cDNA DKFZp564G1162                                                                       |
| AL049949 | cDNA DKFZp564L0822                                                                       |
| AL050002 | cDNA DKFZp564O222                                                                        |
| AL050159 | cDNA DKFZp586A0522                                                                       |
| AL050122 | cDNA DKFZp586E121                                                                        |
| AL080111 | cDNA DKFZp586G2222                                                                       |
| AL050151 | cDNA DKFZp586J0720                                                                       |
| AL049432 | cDNA DKFZp586J231                                                                        |
| AL049471 | cDNA DKFZp586N012                                                                        |
| A1694317 | CGG triplet repeat binding protein 1                                                     |
| AF007132 | clone 23551                                                                              |
| AF007150 | clone 23767 and 23782 mRNA sequences                                                     |
| AF038172 | clone 23923                                                                              |
| AF070648 | clone 24651                                                                              |
| AF052169 | clone 24775                                                                              |
| M64349   | cyclin D1                                                                                |
| AB015051 | death-associated protein 6                                                               |
| AL080235 | DKFZP586E1621 protein                                                                    |
| A1640861 | dynein, cytoplasmic, light intermediate polypeptide 2                                    |
| U03877   | EGF-containing fibulin-like extracellular matrix protein 1                               |
| X52001   | endothelin 3                                                                             |
| X51956   | ENO2 gene for neuron specific (gamma) enolase                                            |
| M60459   | erythropoietin receptor                                                                  |
| W28612   | ESTs                                                                                     |
| U09278   | fibroblast activation protein, alpha                                                     |
| AJ008112 | formin-like                                                                              |
| AB012911 | frizzled (Drosophila) homolog 6                                                          |
| U67784   | G protein-coupled receptor                                                               |
| L15388   | G protein-coupled receptor kinase 5                                                      |
| M62400   | gamma-aminobutyric acid receptor type A rho-1 subunit                                    |
| M97347   | glucosaminyl (N-acetyl) transferase 1, core 2 (beta-1,6-N-acetylglucosaminyltransferase) |
| X76648   | glutaredoxin (thioltransferase)                                                          |
| U33267   | glycine receptor, beta                                                                   |
| X54232   | glypican 1                                                                               |
| M11717   | heat shock 70kD protein 1A                                                               |
| M59830   | heat shock 70kD protein 1B                                                               |
| X78565   | hexabrachion (tenascin C, cytotactin)                                                    |
| X92518   | high-mobility group (nonhistone chromosomal) protein isoform I-C                         |
| AF093264 | Homer, neuronal immediate early gene, 2                                                  |
| AA149431 | hypothetical protein DKFZp761F2014                                                       |

|          |                                                                        |
|----------|------------------------------------------------------------------------|
| X77956   | inhibitor of DNA binding 1, dominant negative helix-loop-helix protein |
| U01062   | inositol 1,4,5-triphosphate receptor, type 3                           |
| U96922   | inositol polyphosphate-4-phosphatase, type II, 105kD                   |
| AB006537 | interleukin 1 receptor accessory protein                               |
| X52425   | interleukin 4 receptor                                                 |
| M13903   | involucrin                                                             |
| M14660   | ISG-54K gene (interferon stimulated gene) encoding a 54 kDA protein    |
| AB011109 | KIAA0537 gene product                                                  |
| AB020650 | KIAA0843 protein                                                       |
| AB020676 | KIAA0869 protein                                                       |
| W52003   | KIAA1237 protein                                                       |
| AJ001684 | killer cell lectin-like receptor subfamily C, member 2 (NKG2C)         |
| M94362   | lamin B2                                                               |
| M55210   | laminin B2 chain                                                       |
| AB023206 | Leman coiled-coil protein                                              |
| AI762213 | lipocalin 2 (oncogene 24p3)                                            |
| U21128   | lumican                                                                |
| X70326   | macrophage myristoylated alanine-rich C kinase substrate               |
| AF010193 | MAD (mothers against decapentaplegic, Drosophila) homolog 7            |
| D55649   | mannosidase, alpha, class 2A, member 2                                 |
| U10693   | melanoma antigen, family A, 8                                          |
| U37283   | Microfibril-associated glycoprotein-2                                  |
| X69433   | mitochondrial isocitrate dehydrogenase (NADP+)                         |
| AI597616 | mitochondrial ribosomal protein L33                                    |
| AI688516 | NADH dehydrogenase (ubiquinone) 1 alpha subcomplex, 2 (8kD, B8)        |
| X05608   | neurofilament, light polypeptide (68kD)                                |
| U08021   | nicotinamide N-methyltransferase                                       |
| U97669   | Notch (Drosophila) homolog 3                                           |
| X64318   | nuclear factor, interleukin 3 regulated                                |
| X77548   | nuclear receptor coactivator 4                                         |
| X12794   | nuclear receptor subfamily 2, group F, member 6                        |
| AL039458 | ortholog of mouse integral membrane glycoprotein LIG-1                 |
| AL023553 | ortholog of rat pippin                                                 |
| AF052124 | osteopontin                                                            |
| AF010315 | p53-induced protein                                                    |
| AF017786 | phosphatidic acid phosphohydrolase homolog (Dri42)                     |
| M16750   | pim-1 oncogene                                                         |
| M21574   | platelet-derived growth factor receptor, alpha polypeptide             |
| J03278   | platelet-derived growth factor receptor, beta polypeptide              |
| U97519   | podocalyxin-like                                                       |
| D15049   | protein tyrosine phosphatase precursor                                 |
| M68941   | protein tyrosine phosphatase, non-receptor type 4 (megakaryocyte)      |
| X54134   | protein tyrosine phosphatase, receptor type, E                         |
| D64053   | protein tyrosine phosphatase, receptor type, R                         |
| U90920   | PTPL1-associated RhoGAP 1                                              |
| U59877   | RAB31, member RAS oncogene family                                      |
| S81914   | radiation-inducible immediate-early gene                               |
| M14949   | R-ras                                                                  |
| AI800578 | S-adenosylhomocysteine hydrolase-like 1                                |
| AF024636 | serine/threonine kinase 24 (Ste20, yeast homolog)                      |

|          |                                                                                    |
|----------|------------------------------------------------------------------------------------|
| Y10032   | serum/glucocorticoid regulated kinase                                              |
| X75342   | SHB adaptor protein (a Src homology 2 protein)                                     |
| U48508   | skeletal muscle ryanodine receptor                                                 |
| U64197   | small inducible cytokine subfamily A (Cys-Cys), member 20                          |
| M20681   | solute carrier family 2 (facilitated glucose transporter), member 3                |
| AF057164 | solute carrier family 22 (organic cation transporter), member 5                    |
| AF015926 | solute carrier family 9 (sodium/hydrogen exchanger), isoform 3 regulatory factor 1 |
| Z48199   | syndecan 1                                                                         |
| AJ006973 | target of myb1 (chicken) homolog                                                   |
| M99435   | transducin-like enhancer of split 1, homolog of Drosophila E(sp1)                  |
| X14885   | transforming growth factor, beta 3                                                 |
| D50683   | transforming growth factor, beta receptor II (70-80kD)                             |
| M34057   | transforming growth factor-beta 1 binding protein                                  |
| M77349   | transforming growth factor-beta induced gene product (BIGH3)                       |
| AI743134 | trinucleotide repeat containing 3                                                  |
| M19267   | tropomyosin 1 (alpha)                                                              |
| U43916   | tumor-associated membrane protein homolog                                          |
| AL050108 | WD repeat domain 1                                                                 |

---



**Common genes regulated by estradiol and tamoxifen**

| <b>Accession number</b> | <b>Gene</b>                                                                         |
|-------------------------|-------------------------------------------------------------------------------------|
| Y10183                  | activated leucocyte cell adhesion molecule                                          |
| AL050025                | adaptor-related protein complex 1, gamma 1 subunit                                  |
| K02215                  | angiotensinogen                                                                     |
| M60314                  | bone morphogenetic protein 5                                                        |
| AF037335                | carbonic anhydrase XII                                                              |
| X51405                  | carboxypeptidase E                                                                  |
| U67319                  | caspase 7, apoptosis-related cysteine protease                                      |
| AA151971                | cDNA clone IMAGE 588365                                                             |
| AL080192                | cDNA DKFZp434B102                                                                   |
| AL050173                | chromosome 21 open reading frame 25                                                 |
| M20469                  | clathrin, light polypeptide (Lcb)                                                   |
| AF038198                | clone 23928                                                                         |
| AF070632                | clone 24405                                                                         |
| AL050024                | DKFZP564D206 protein                                                                |
| X68277                  | dual specificity phosphatase 1                                                      |
| AF059611                | ectodermal-neural cortex (with BTB-like domain)                                     |
| M27826                  | endogenous retroviral protease                                                      |
| L25879                  | epoxide hydrolase 1, microsomal (xenobiotic)                                        |
| M14539                  | factor XIII subunit A                                                               |
| AF007139                | fibronectin leucine rich transmembrane protein 1                                    |
| M19481                  | follistatin                                                                         |
| AF032885                | forkhead protein                                                                    |
| U29332                  | four and a half LIM domains 2                                                       |
| AJ011001                | G protein-coupled receptor 56                                                       |
| AF023466                | glycine-N-acyltransferase                                                           |
| L13698                  | growth arrest-specific 1                                                            |
| D87119                  | GS3955 protein                                                                      |
| L13436                  | guanylate cyclase                                                                   |
| AF054589                | HIC protein                                                                         |
| AA522530                | hypothetical protein                                                                |
| L27560                  | insulin-like growth factor binding protein 5                                        |
| U20982                  | insulin-like growth factor-binding protein 4                                        |
| U88964                  | interferon stimulated gene (20kD)                                                   |
| M29696                  | interleukin 7 receptor                                                              |
| AB020685                | KIAA0878 protein                                                                    |
| AB023227                | KIAA1010 protein                                                                    |
| AJ001683                | killer cell lectin-like receptor subfamily C, member 4                              |
| U43328                  | link protein (cartilage linking protein 1)                                          |
| M15856                  | lipoprotein lipase                                                                  |
| X15306                  | neurofilament, heavy polypeptide (200kD)                                            |
| M32011                  | neutrophil oxidase factor (p67-phox)                                                |
| U08021                  | nicotinamide N-methyltransferase                                                    |
| M69043                  | nuclear factor of kappa light polypeptide gene enhancer in B-cells inhibitor, alpha |
| X00737                  | nucleoside phosphorylase                                                            |
| tigr:HG4679-<br>HT5104  | Oncogene Ret/Ptc, Fusion Activated                                                  |
| tigr:HG4677-<br>HT5102  | Oncogene Ret/Ptc2, Fusion Activated                                                 |

|                  |                                                                                           |
|------------------|-------------------------------------------------------------------------------------------|
| AB023209         | palladin                                                                                  |
| L20971           | phosphodiesterase 4B, cAMP-specific (dunce (Drosophila)-homolog phosphodiesterase E4)     |
| Z54367           | plectin 1, intermediate filament binding protein, 500kD                                   |
| AF022797         | potassium intermediate/small conductance calcium-activated channel, subfamily N, member 4 |
| Y07909           | Progression Associated Protein                                                            |
| U47924           | protein "A"                                                                               |
| Y17169           | protein tyrosine kinase 9-like (A6-related protein)                                       |
| AL049538         | ras association (RalGDS/AF-6) domain containing protein JC265                             |
| S62035           | Ras protein-specific guanine nucleotide-releasing factor 1                                |
| AF030107         | regulator of G-protein signalling 13                                                      |
| U73167           | sema domain, immunoglobulin domain (Ig), short basic domain, secreted, (semaphorin) 3B    |
| Y11251           | splicing factor, arginine/serine-rich 2, interacting protein                              |
| Z46629           | SRY (sex determining region Y)-box 9 (campomelic dysplasia, autosomal sex-reversal)       |
| D38305           | transducer of ERBB2, 1                                                                    |
| X70340           | transforming growth factor, alpha                                                         |
| M19154           | transforming growth factor, beta 2                                                        |
| AF049910         | transforming, acidic coiled-coil containing protein 1                                     |
| M55153           | transglutaminase                                                                          |
| M77016           | tropomodulin                                                                              |
| tigr:HG620-HT620 | Tyrosine Phosphatase, Epsilon                                                             |
| AL021977         | v-maf musculoaponeurotic fibrosarcoma (avian) oncogene family, protein F                  |
| M92843           | zinc finger transcriptional regulator                                                     |

#### Unique genes regulated by estradiol, but not tamoxifen

| Accession number | Gene                                                              |
|------------------|-------------------------------------------------------------------|
| X97335           | A kinase (PRKA) anchor protein 1                                  |
| D31883           | actin binding LIM protein 1                                       |
| U02390           | adenylyl cyclase-associated protein 2                             |
| X97324           | adipose differentiation-related protein                           |
| AB016811         | ADP-ribosylation factor-like 7                                    |
| AF043129         | AF043129:untitled /cds=(0,1379)                                   |
| M80899           | AHNAK nucleoprotein (desmoyokin)                                  |
| X05409           | aldehyde dehydrogenase 2 family (mitochondrial)                   |
| X01683           | alpha-1 antitrypsin                                               |
| AF002282         | alpha-actinin-2-associated LIM protein                            |
| N74607           | aquaporin 3                                                       |
| AF091242         | ATP sulfurylase/APS kinase 2                                      |
| U78735           | ATP-binding cassette, sub-family A (ABC1), member 3               |
| X83467           | ATP-binding cassette, sub-family D (ALD), member 3                |
| L35594           | autotaxin                                                         |
| U45878           | baculoviral IAP repeat-containing 3                               |
| AB006757         | BH-protocadherin (brain-heart)                                    |
| U43842           | bone morphogenetic protein 4                                      |
| X56667           | calbindin 2, (29kD, calretinin)                                   |
| AF038852         | calcium channel, voltage-dependent, beta 4 subunit                |
| U66063           | calcium/calmodulin-dependent protein kinase (CaM kinase) II gamma |
| J03037           | carbonic anhydrase II                                             |
| M83667           | CCAAT/enhancer binding protein (C/EBP), delta                     |
| AB015629         | CD209 antigen-like                                                |

|                    |                                                                                  |
|--------------------|----------------------------------------------------------------------------------|
| Z11697             | CD83 antigen (activated B lymphocytes, immunoglobulin superfamily)               |
| T89926             | cDNA clone IMAGE 117499                                                          |
| AI222594           | cDNA clone IMAGE 1839416                                                         |
| AA933984           | cDNA DKFZp564B222                                                                |
| AL049250           | cDNA DKFZp564D113                                                                |
| AL049941           | cDNA DKFZp564E2222                                                               |
| AL050227           | cDNA DKFZp586M0723                                                               |
| W26667             | cDNA FLJ14821 fis, clone OVARC1000556                                            |
| AA156240           | cDNA: FLJ22182 fis, clone HRC00953                                               |
| AB007969           | chromosome 1 specific transcript KIAA0500                                        |
| M82882             | cis-acting sequence                                                              |
| X81637             | clathrin light chain b                                                           |
| AB014527           | CLIP-associating protein 2                                                       |
| U79293             | clone 23948                                                                      |
| L25286             | collagen, type XV, alpha 1                                                       |
| X78947             | connective tissue growth factor                                                  |
| Y07593             | coxsackie virus and adenovirus receptor                                          |
| U04636             | cyclooxygenase-2                                                                 |
| X70377             | cystatin D                                                                       |
| AI017574           | cysteine-rich protein 1 (intestinal)                                             |
| X13589             | cytochrome P450, subfamily XIX (aromatization of androgens)                      |
| Y17282             | cytokeratin type II                                                              |
| S79854             | deiodinase, iodothyronine, type III                                              |
| AB007860           | development and differentiation enhancing factor 2                               |
| AL080156           | DKFZP434J214 protein                                                             |
| AA143321           | DKFZP586M1523 protein                                                            |
| AI810807           | dynein, cytoplasmic, intermediate polypeptide 1                                  |
| U80811             | endothelial differentiation, lysophosphatidic acid G-protein-coupled receptor, 2 |
| L36645             | EphA4                                                                            |
| W28438             | ESTs                                                                             |
| M55267             | EV12 protein                                                                     |
| D88308             | fatty-acid-Coenzyme A ligase, very long-chain 1                                  |
| M87770             | fibroblast growth factor receptor (K-sam)                                        |
| AB007865           | fibronectin leucine rich transmembrane protein 2                                 |
| M88279             | FK506-binding protein 4 (59kD)                                                   |
| AB011126           | formin-binding protein 17                                                        |
| L37882             | frizzled (Drosophila) homolog 2                                                  |
| AB017365           | frizzled (Drosophila) homolog 7                                                  |
| AF056085           | G protein-coupled receptor 51                                                    |
| U10991             | G2 protein                                                                       |
| AF062534           | genethonin 1                                                                     |
| AB007296           | GLI-Kruppel family member GLI2                                                   |
| AI703188           | G-protein coupled receptor                                                       |
| D86962             | growth factor receptor-bound protein 10                                          |
| U19523             | GTP cyclohydrolase 1 (dopa-responsive dystonia)                                  |
| tigr:HG1103-HT1103 | Guanine Nucleotide-Binding Protein Ral, Ras-Oncogene Related                     |
| AI200373           | H2A histone family, member I                                                     |
| U70370             | hindlimb expressed homeobox protein backfoot (Bft)                               |
| U54804             | hyaluronan synthase 2                                                            |
| U05659             | hydroxysteroid (17-beta) dehydrogenase 3                                         |

|                    |                                                                                        |
|--------------------|----------------------------------------------------------------------------------------|
| M62402             | insulin-like growth factor binding protein 6                                           |
| X58377             | interleukin 11                                                                         |
| AF031167           | interleukin 15                                                                         |
| M17017             | interleukin 8                                                                          |
| M28225             | JE gene encoding a monocyte secretory protein                                          |
| X56681             | jun D proto-oncogene                                                                   |
| M20812             | kappa-immunoglobulin germline pseudogene (cos118) variable region (subgroup V kappa I) |
| X07696             | keratin 15                                                                             |
| Y00503             | keratin 19                                                                             |
| AB002352           | KIAA0354 gene product                                                                  |
| AB002366           | KIAA0368 protein                                                                       |
| AB007916           | KIAA0447 gene product                                                                  |
| AB007940           | KIAA0471 gene product                                                                  |
| AB011147           | KIAA0575 gene product                                                                  |
| AB018347           | KIAA0804 protein                                                                       |
| AB023158           | KIAA0941 protein                                                                       |
| AB023169           | KIAA0952 protein                                                                       |
| AB028957           | KIAA1034 protein                                                                       |
| AB029025           | KIAA1102 protein                                                                       |
| S78569             | laminin, alpha 4                                                                       |
| AD000684           | liver-specific bHLH-Zip transcription factor                                           |
| L16895             | lysyl oxidase                                                                          |
| U68019             | MAD (mothers against decapentaplegic, Drosophila) homolog 3                            |
| L23808             | matrix metalloproteinase 12 (macrophage elastase)                                      |
| U16261             | MDA-7 (interleukin 24)                                                                 |
| U71087             | mitogen-activated protein kinase kinase 5                                              |
| U72263             | multiple exostoses type II protein EXT2.I                                              |
| U67368             | multiple exostosis 2 (EXT2)                                                            |
| AB018342           | myosin X                                                                               |
| AA631972           | natural killer cell transcript 4                                                       |
| AJ011896           | Nef-associated factor 1                                                                |
| U79299             | neuroblastoma (nerve tissue) protein                                                   |
| X70991             | NGFI-A binding protein 2 (EGR1 binding protein 2)                                      |
| AA203138           | NPD009 protein                                                                         |
| U85193             | nuclear factor I/B                                                                     |
| X84373             | nuclear receptor interacting protein 1                                                 |
| tigr:HG2724-HT2820 | Oncogene Tls/Chop, Fusion Activated                                                    |
| AB008822           | osteoclastogenesis inhibitory factor                                                   |
| U30521             | P311 protein                                                                           |
| AF012281           | PDZ domain containing 1                                                                |
| D90070             | phorbol-12-myristate-13-acetate-induced protein 1                                      |
| X97675             | plakophilin 2                                                                          |
| X02419             | plasminogen activator, urokinase                                                       |
| X00948             | prepro-relaxin H2                                                                      |
| U84573             | procollagen-lysine, 2-oxoglutarate 5-dioxygenase (lysine hydroxylase) 2                |
| D86096             | prostaglandin E receptor EP3 subtype                                                   |
| D87930             | protein phosphatase 1, regulatory (inhibitor) subunit 12A                              |
| X97198             | protein tyrosine phosphatase, receptor type, U                                         |
| U61836             | putative cyclin G1 interacting protein                                                 |
| D38449             | putative G protein coupled receptor                                                    |

|          |                                                                                                                 |
|----------|-----------------------------------------------------------------------------------------------------------------|
| AB023061 | RAB36, member RAS oncogene family                                                                               |
| AF117829 | receptor-interacting serine-threonine kinase 2                                                                  |
| U32331   | regulated in glioma                                                                                             |
| AL050011 | retinoic acid induced 14                                                                                        |
| AF095448 | retinoic acid induced 3                                                                                         |
| M64936   | retinoic acid-inducible endogenous retroviral DNA                                                               |
| X00129   | retinol-binding protein 4, plasma                                                                               |
| D37931   | ribonuclease, RNase A family, 4                                                                                 |
| AB022663 | ring finger protein 14                                                                                          |
| S62138   | S62138:TLS/CHOP=hybrid gene {translocation breakpoint} [human, myxoid liposarcomas cells, mRNA Mutant, 1682 nt] |
| AA829286 | serum amyloid A1                                                                                                |
| AF059617 | serum-inducible kinase                                                                                          |
| A1337192 | SH3 domain binding glutamic acid-rich protein                                                                   |
| L13972   | sialyltransferase 4A (beta-galactosidase alpha-2,3-sialyltransferase)                                           |
| U43899   | signal transducing adaptor molecule (SH3 domain and ITAM motif) 1                                               |
| M26683   | small inducible cytokine A2 (monocyte chemotactic protein 1, homologous to mouse Sig-je)                        |
| AB018249 | small inducible cytokine subfamily A (Cys-Cys), member 16                                                       |
| AF004841 | surface glycoprotein, Ig superfamily member                                                                     |
| AF065389 | tetraspan 5                                                                                                     |
| AF050110 | TGFB inducible early growth response                                                                            |
| X89750   | TGFB-induced factor (TALE family homeobox)                                                                      |
| AA704137 | Thy-1 cell surface antigen                                                                                      |
| L40387   | thyroid receptor interactor (TRIP14)                                                                            |
| U19261   | TNF receptor-associated factor 1                                                                                |
| U59863   | TRAF-interacting protein I-TRAF                                                                                 |
| U66061   | trypsinogen C                                                                                                   |
| X06956   | tubulin, alpha 1 (testis specific)                                                                              |
| M17589   | tyrosine hydroxylase                                                                                            |
| AA883502 | ubiquitin-conjugating enzyme E2L 6                                                                              |
| U41514   | UDP-N-acetyl-alpha-D-galactosamine:polypeptide N-acetylgalactosaminyltransferase 1 (GalNAc-T1)                  |
| Y09008   | uracil-DNA glycosylase                                                                                          |
| M34309   | v-erb-b2 avian erythroblastic leukemia viral oncogene homolog 3                                                 |
| AF070523 | vitamin A responsive; cytoskeleton related                                                                      |
| AF100780 | WNT1 inducible signaling pathway protein 2 (WISP-2)                                                             |
| AF084481 | Wolfram syndrome 1 (wolframin)                                                                                  |
| Y09538   | zinc finger protein 185 (LIM domain)                                                                            |

---

#### Unique genes regulated by tamoxifen, but not estradiol

| Accession number | Gene                                                 |
|------------------|------------------------------------------------------|
| AJ225089         | 2'-5'-oligoadenylate synthetase-like                 |
| X57830           | 5-hydroxytryptamine receptor 2A                      |
| D88674           | antizyme inhibitor                                   |
| AB014511         | ATPase, Class II, type 9A                            |
| AC004010         | BAC clone GS1-99H8                                   |
| AB004066         | basic helix-loop-helix domain containing, class B, 2 |
| M90357           | basic transcription factor 3a                        |
| AF042166         | beta-filamin                                         |
| X51801           | bone morphogenetic protein 7 (osteogenic protein 1)  |

|                    |                                                                                  |
|--------------------|----------------------------------------------------------------------------------|
| X60201             | brain-derived neurotrophic factor                                                |
| AL050089           | bromodomain adjacent to zinc finger domain, 1A                                   |
| AB002803           | BTB and CNC homology 1, basic leucine zipper transcription factor 1              |
| D21255             | cadherin 11, type 2, OB-cadherin (osteoblast)                                    |
| M34064             | cadherin 2, type 1, N-cadherin (neuronal)                                        |
| M23254             | calpain 2, (m/II) large subunit                                                  |
| X52560             | CCAAT/enhancer binding protein (C/EBP), beta                                     |
| AF098641           | CD44 isoform RC (CD44) mRNA, complete cds                                        |
| AL109681           | cDNA clone EUROIMAGE 112333                                                      |
| AI743745           | cDNA clone IMAGE 2368811                                                         |
| N90755             | cDNA clone IMAGE 302798                                                          |
| AA216639           | cDNA clone IMAGE 649765                                                          |
| AL049265           | cDNA DKFZp564F053                                                                |
| AL080082           | cDNA DKFZp564G1162                                                               |
| AL080093           | cDNA DKFZp564N1662                                                               |
| AL080232           | cDNA DKFZp586A061                                                                |
| AL050122           | cDNA DKFZp586E121                                                                |
| AL080111           | cDNA DKFZp586G2222                                                               |
| AL050151           | cDNA DKFZp586J0720                                                               |
| AL049432           | cDNA DKFZp586J231                                                                |
| AL049471           | cDNA DKFZp586N012                                                                |
| X05360             | cell division cycle 2, G1 to S and G2 to M                                       |
| M10905             | cellular fibronectin (fibronectin 1)                                             |
| AB007972           | chromosome 1 specific transcript KIAA0503                                        |
| AF009426           | chromosome 18 open reading frame 1                                               |
| AF007150           | clone 23767 and 23782 mRNA sequences                                             |
| AF038172           | clone 23923                                                                      |
| AF070648           | clone 24651                                                                      |
| J02931             | coagulation factor III (thromboplastin, tissue factor)                           |
| Y15915             | collagen, type I, alpha 1                                                        |
| X14420             | collagen, type III, alpha 1 (Ehlers-Danlos syndrome type IV, autosomal dominant) |
| X52022             | collagen, type VI, alpha 3                                                       |
| J04177             | collagen, type XI, alpha 1                                                       |
| M64349             | cyclin D1                                                                        |
| U46692             | cystatin B (stefin B)                                                            |
| H87920             | cytochrome P450, subfamily XXVIA, polypeptide 1                                  |
| U41387             | DEAD/H (Asp-Glu-Ala-Asp/His) box polypeptide 21                                  |
| AB015051           | death-associated protein 6                                                       |
| AL050190           | DKFZP586B0923 protein                                                            |
| AL080235           | DKFZP586E1621 protein                                                            |
| M67439             | dopamine receptor D5                                                             |
| U03877             | EGF-containing fibulin-like extracellular matrix protein 1                       |
| U70312             | EGF-like repeats and discoidin I-like domains 3                                  |
| AF027299           | erythrocyte membrane protein band 4.1-like 2                                     |
| AI808712           | ESTs                                                                             |
| W28612             | ESTs                                                                             |
| D10040             | fatty-acid-Coenzyme A ligase, long-chain 2                                       |
| U09278             | fibroblast activation protein, alpha                                             |
| tigr:HG3044-HT3742 | Fibronectin, Alt. Splice 1                                                       |
| AJ012737           | filamin C, gamma (actin-binding protein-280)                                     |

|                    |                                                                                      |
|--------------------|--------------------------------------------------------------------------------------|
| AF061034           | FIP2 alternatively translated mRNA                                                   |
| tigr:HG1139-HT4910 | Fk506-Binding Protein, Alt. Splice 2                                                 |
| AF089750           | flotillin 1                                                                          |
| AF078096           | forkhead box C1                                                                      |
| AJ008112           | formin-like                                                                          |
| AB012911           | frizzled (Drosophila) homolog 6                                                      |
| U67784             | G protein-coupled receptor                                                           |
| L15388             | G protein-coupled receptor kinase 5                                                  |
| M69199             | G0S2 (putative lymphocyte G0/G1 switch gene)                                         |
| M60091             | galactose-1-phosphate uridylyltransferase                                            |
| X52947             | gap junction protein, alpha 1, 43kD (connexin 43)                                    |
| J03060             | glucocerebrosidase                                                                   |
| X03674             | glucose-6-phosphate dehydrogenase                                                    |
| U08997             | Glutamate dehydrogenase-2                                                            |
| U33267             | glycine receptor, beta                                                               |
| X54232             | glypican 1                                                                           |
| X03473             | H1 histone family, member 0                                                          |
| AF093264           | Homer, neuronal immediate early gene, 2                                              |
| AL031781           | homolog of mouse quaking QKI (KH domain RNA binding protein)                         |
| AA675900           | Huntingtin-interacting protein A                                                     |
| AB015331           | hypothetical protein DKFZp434P0116                                                   |
| AA195301           | hypothetical protein MGC2574                                                         |
| X77956             | inhibitor of DNA binding 1, dominant negative helix-loop-helix protein               |
| U01062             | inositol 1,4,5-triphosphate receptor, type 3                                         |
| S62539             | insulin receptor substrate 1                                                         |
| AA477898           | integral membrane protein 2B                                                         |
| X52425             | interleukin 4 receptor                                                               |
| M13903             | involucrin                                                                           |
| M14660             | ISG-54K gene (interferon stimulated gene) encoding a 54 kDa protein                  |
| M13143             | kallikrein B, plasma (Fletcher factor) 1                                             |
| M26326             | keratin 18                                                                           |
| D31888             | KIAA0071 protein                                                                     |
| D42043             | KIAA0084 protein                                                                     |
| D14659             | KIAA0103 gene product                                                                |
| D80011             | KIAA0189 gene product                                                                |
| AB020650           | KIAA0843 protein                                                                     |
| AB023152           | KIAA0935 protein                                                                     |
| W52003             | KIAA1237 protein                                                                     |
| AJ001685           | killer cell lectin-like receptor subfamily C, member 3 (NKG2E)                       |
| X65873             | kinesin family member 5B                                                             |
| M94362             | lamin B2                                                                             |
| M55210             | laminin B2 chain                                                                     |
| AB011105           | laminin, alpha 5                                                                     |
| M34057             | latent transforming growth factor beta binding protein 1                             |
| Z37976             | latent transforming growth factor beta binding protein 2                             |
| AB006780           | lectin, galactoside-binding, soluble, 3 (galectin 3)                                 |
| U69609             | leucine rich repeat (in FLII) interacting protein 1                                  |
| X70326             | macrophage myristoylated alanine-rich C kinase substrate                             |
| AF010193           | MAD (mothers against decapentaplegic, Drosophila) homolog 7                          |
| J05070             | matrix metalloproteinase 9 (gelatinase B, 92kD gelatinase, 92kD type IV collagenase) |

|          |                                                                                        |
|----------|----------------------------------------------------------------------------------------|
| U10693   | melanoma antigen, family A, 8                                                          |
| U41766   | metalloprotease/disintegrin/cysteine-rich protein precursor                            |
| X69433   | mitochondrial isocitrate dehydrogenase (NADP+)                                         |
| A1597616 | mitochondrial ribosomal protein L33                                                    |
| D14812   | MORF-related gene X                                                                    |
| D83699   | neuronal death protein                                                                 |
| AF045451 | NGFI-A binding protein 1 (EGR1 binding protein 1)                                      |
| X64318   | nuclear factor, interleukin 3 regulated                                                |
| X77548   | nuclear receptor coactivator 4                                                         |
| D16815   | nuclear receptor subfamily 1, group D, member 2                                        |
| U60805   | oncostatin M receptor                                                                  |
| AL039458 | ortholog of mouse integral membrane glycoprotein LIG-1                                 |
| AL023553 | ortholog of rat pippin                                                                 |
| AF052124 | osteopontin                                                                            |
| AF010315 | p53-induced protein                                                                    |
| M24351   | parathyroid hormone-like protein                                                       |
| D49396   | peroxiredoxin 3                                                                        |
| AB006746 | phospholipid scramblase 1                                                              |
| M26167   | platelet factor 4 variant 1                                                            |
| M57399   | pleiotrophin (heparin binding growth factor 8, neurite growth-promoting factor 1)      |
| U97519   | podocalyxin-like                                                                       |
| Z29505   | poly(rC)-binding protein 1                                                             |
| D50312   | potassium inwardly-rectifying channel, subfamily J, member 8                           |
| AF006010 | progesterone induced protein                                                           |
| U09759   | protein kinase (JNK2)                                                                  |
| U68111   | protein phosphatase inhibitor 2                                                        |
| D15049   | protein tyrosine phosphatase precursor                                                 |
| M68941   | protein tyrosine phosphatase, non-receptor type 4 (megakaryocyte)                      |
| X54134   | protein tyrosine phosphatase, receptor type, E                                         |
| U90920   | PTPL1-associated RhoGAP 1                                                              |
| U59877   | RAB31, member RAS oncogene family                                                      |
| M28215   | RAB5A, member RAS oncogene family                                                      |
| S81914   | radiation-inducible immediate-early gene                                               |
| M23379   | RAS p21 protein activator (GTPase activating protein) 1                                |
| AL043108 | ras-like protein                                                                       |
| AF045229 | regulator of G-protein signalling 10                                                   |
| A1267373 | regulator of G-protein signalling 4                                                    |
| D86988   | regulator of nonsense transcripts 1                                                    |
| D84111   | RNA-binding protein gene with multiple splicing                                        |
| R59606   | S-adenosylhomocysteine hydrolase-like 1                                                |
| Y18264   | sal (Drosophila)-like 1                                                                |
| AB000220 | sema domain, immunoglobulin domain (Ig), short basic domain, secreted, (semaphorin) 3C |
| AF024636 | serine/threonine kinase 24 (Ste20, yeast homolog)                                      |
| X75342   | SHB adaptor protein (a Src homology 2 protein)                                         |
| U48508   | skeletal muscle ryanodine receptor                                                     |
| M20681   | solute carrier family 2 (facilitated glucose transporter), member 3                    |
| AL022326 | synaptogyrin 1                                                                         |
| AF000652 | syndecan binding protein (syntenin)                                                    |
| L08850   | synuclein, alpha (non A4 component of amyloid precursor)                               |
| M62424   | thrombin (coagulation factor II) receptor                                              |



|          |                                                                |
|----------|----------------------------------------------------------------|
| X14787   | thrombospondin 1                                               |
| M90657   | transmembrane 4 superfamily member 1                           |
| M19267   | tropomyosin 1 (alpha)                                          |
| D13413   | tumor-associated 120 kDa nuclear protein                       |
| U43916   | tumor-associated membrane protein homolog                      |
| AF049891 | tyrosylprotein sulfotransferase 2                              |
| AF055376 | v-maf musculoaponeurotic fibrosarcoma (avian) oncogene homolog |
| V00568   | v-myc avian myelocytomatosis viral oncogene homolog            |
| AL050108 | WD repeat domain 1                                             |

---

**Common genes regulated by raloxifene and tamoxifen**

| <b>Accession number</b> | <b>Gene</b>                                                |
|-------------------------|------------------------------------------------------------|
| AJ225089                | 2'-5'-oligoadenylate synthetase-like                       |
| X57830                  | 5-hydroxytryptamine receptor 2A                            |
| AL050025                | adaptor-related protein complex 1, gamma 1 subunit         |
| AB014511                | ATPase, Class II, type 9A                                  |
| AC004010                | BAC clone GS1-99H8                                         |
| AF042166                | beta-filamin                                               |
| X51801                  | bone morphogenetic protein 7 (osteogenic protein 1)        |
| M34064                  | cadherin 2, type 1, N-cadherin (neuronal)                  |
| M23254                  | calpain 2, (m/II) large subunit                            |
| AF037335                | carbonic anhydrase XII                                     |
| U67319                  | caspase 7, apoptosis-related cysteine protease             |
| X52560                  | CCAAT/enhancer binding protein (C/EBP), beta               |
| N90755                  | cDNA clone IMAGE 302798                                    |
| AA151971                | cDNA clone IMAGE 588365                                    |
| AL080082                | cDNA DKFZp564G1162                                         |
| AL050122                | cDNA DKFZp586E121                                          |
| AL080111                | cDNA DKFZp586G2222                                         |
| AL050151                | cDNA DKFZp586J0720                                         |
| AL049432                | cDNA DKFZp586J231                                          |
| AL049471                | cDNA DKFZp586N012                                          |
| AL050173                | chromosome 21 open reading frame 25                        |
| M20469                  | clathrin, light polypeptide (Lcb)                          |
| AF007150                | clone 23767 and 23782 mRNA sequences                       |
| AF038172                | clone 23923                                                |
| AF038198                | clone 23928                                                |
| AF070632                | clone 24405                                                |
| AF070648                | clone 24651                                                |
| M64349                  | cyclin D1                                                  |
| AB015051                | death-associated protein 6                                 |
| AL080235                | DKFZP586E1621 protein                                      |
| AF059611                | ectodermal-neural cortex (with BTB-like domain)            |
| U03877                  | EGF-containing fibulin-like extracellular matrix protein 1 |
| M27826                  | endogenous retroviral protease                             |
| W28612                  | ESTs                                                       |
| M14539                  | factor XIII subunit A                                      |
| U09278                  | fibroblast activation protein, alpha                       |
| AF007139                | fibronectin leucine rich transmembrane protein 1           |
| M19481                  | folliculin                                                 |
| AF032885                | forkhead box O1A (rhabdomyosarcoma)                        |
| AJ008112                | formin-like                                                |
| U29332                  | four and a half LIM domains 2                              |
| AB012911                | frizzled (Drosophila) homolog 6                            |
| U67784                  | G protein-coupled receptor                                 |
| AJ011001                | G protein-coupled receptor 56                              |
| L15388                  | G protein-coupled receptor kinase 5                        |
| U33267                  | glycine receptor, beta                                     |
| AF023466                | glycine-N-acyltransferase                                  |

|                        |                                                                                           |
|------------------------|-------------------------------------------------------------------------------------------|
| X54232                 | glypican 1                                                                                |
| D87119                 | GS3955 protein                                                                            |
| L13436                 | guanylate cyclase                                                                         |
| AF054589               | HIC protein                                                                               |
| AF093264               | Homer, neuronal immediate early gene, 2                                                   |
| AA522530               | hypothetical protein                                                                      |
| X77956                 | inhibitor of DNA binding 1, dominant negative helix-loop-helix protein                    |
| U01062                 | inositol 1,4,5-triphosphate receptor, type 3                                              |
| U20982                 | insulin-like growth factor-binding protein 4                                              |
| U88964                 | interferon stimulated gene (20kD)                                                         |
| X52425                 | interleukin 4 receptor                                                                    |
| M29696                 | interleukin 7 receptor                                                                    |
| M13903                 | involucrin                                                                                |
| M14660                 | ISG-54K gene (interferon stimulated gene) encoding a 54 kDA protein                       |
| AB020650               | KIAA0843 protein                                                                          |
| AB020685               | KIAA0878 protein                                                                          |
| AB023227               | KIAA1010 protein                                                                          |
| W52003                 | KIAA1237 protein                                                                          |
| AJ001683               | killer cell lectin-like receptor subfamily C, member 4                                    |
| M94362                 | lamin B2                                                                                  |
| M55210                 | laminin B2 chain                                                                          |
| U43328                 | link protein (cartilage linking protein 1)                                                |
| AI762213               | lipocalin 2 (oncogene 24p3)                                                               |
| X70326                 | macrophage myristoylated alanine-rich C kinase substrate                                  |
| AF010193               | MAD (mothers against decapentaplegic, Drosophila) homolog 7                               |
| U10693                 | melanoma antigen, family A, 8                                                             |
| X69433                 | mitochondrial isocitrate dehydrogenase (NADP+)                                            |
| AI597616               | mitochondrial ribosomal protein L33                                                       |
| M32011                 | neutrophil oxidase factor (p67-phox)                                                      |
| U08021                 | nicotinamide N-methyltransferase                                                          |
| M69043                 | nuclear factor of kappa light polypeptide gene enhancer in B-cells inhibitor, alpha       |
| X64318                 | nuclear factor, interleukin 3 regulated                                                   |
| X77548                 | nuclear receptor coactivator 4                                                            |
| tigr:HG4679-<br>HT5104 | Oncogene Ret/Ptc, Fusion Activated                                                        |
| tigr:HG4677-<br>HT5102 | Oncogene Ret/Ptc2, Fusion Activated                                                       |
| AL039458               | ortholog of mouse integral membrane glycoprotein LIG-1                                    |
| AL023553               | ortholog of rat pippin                                                                    |
| AF052124               | osteopontin                                                                               |
| AF010315               | p53-induced protein                                                                       |
| AB023209               | palladin                                                                                  |
| U97519                 | podocalyxin-like                                                                          |
| AF022797               | potassium intermediate/small conductance calcium-activated channel, subfamily N, member 4 |
| Y17169                 | protein tyrosine kinase 9-like (A6-related protein)                                       |
| D15049                 | protein tyrosine phosphatase precursor                                                    |
| M68941                 | protein tyrosine phosphatase, non-receptor type 4 (megakaryocyte)                         |
| X54134                 | protein tyrosine phosphatase, receptor type, E                                            |
| U90920                 | PTPL1-associated RhoGAP 1                                                                 |
| U59877                 | RAB31, member RAS oncogene family                                                         |
| S81914                 | radiation-inducible immediate-early gene                                                  |

|                  |                                                                                        |
|------------------|----------------------------------------------------------------------------------------|
| S62035           | Ras protein-specific guanine nucleotide-releasing factor 1                             |
| AF045229         | regulator of G-protein signalling 10                                                   |
| AF030107         | regulator of G-protein signalling 13                                                   |
| D86988           | regulator of nonsense transcripts 1                                                    |
| U73167           | sema domain, immunoglobulin domain (Ig), short basic domain, secreted, (semaphorin) 3B |
| AF024636         | serine/threonine kinase 24 (Ste20, yeast homolog)                                      |
| X75342           | SHB adaptor protein (a Src homology 2 protein)                                         |
| U48508           | skeletal muscle ryanodine receptor                                                     |
| M20681           | solute carrier family 2 (facilitated glucose transporter), member 3                    |
| M19154           | transforming growth factor, beta 2                                                     |
| M34057           | transforming growth factor-beta 1 binding protein                                      |
| AF049910         | transforming, acidic coiled-coil containing protein 1                                  |
| M55153           | transglutaminase                                                                       |
| M77016           | tropomodulin                                                                           |
| M19267           | tropomyosin 1 (alpha)                                                                  |
| U43916           | tumor-associated membrane protein homolog                                              |
| tigr:HG620-HT620 | Tyrosine Phosphatase, Epsilon                                                          |
| AL021977         | v-maf musculoaponeurotic fibrosarcoma (avian) oncogene family, protein F               |
| AL050108         | WD repeat domain 1                                                                     |
| M92843           | zinc finger transcriptional regulator                                                  |

#### Unique genes regulated by raloxifene , but not tamoxifen

| Accession number | Gene                                                                                     |
|------------------|------------------------------------------------------------------------------------------|
| X97335           | A kinase (PRKA) anchor protein 1                                                         |
| AB016811         | ADP-ribosylation factor-like 7                                                           |
| AF043129         | AF043129:untitled /cds=(0,1379)                                                          |
| U66676           | ATP-binding cassette, sub-family B (MDR/TAP), member 9                                   |
| X91249           | ATP-binding cassette, sub-family G (WHITE), member 1                                     |
| L35594           | autotaxin                                                                                |
| AB006755         | BH-protocadherin (brain-heart)                                                           |
| AB005298         | brain-specific angiogenesis inhibitor 2                                                  |
| AL049851         | caspase recruitment domain protein 10                                                    |
| AL109724         | cDNA clone EUROIMAGE 417629                                                              |
| AA532495         | cDNA clone IMAGE 996282                                                                  |
| AA933984         | cDNA DKFZp564B222                                                                        |
| AL049949         | cDNA DKFZp564L0822                                                                       |
| AL050002         | cDNA DKFZp564O222                                                                        |
| AL050159         | cDNA DKFZp586A0522                                                                       |
| A1694317         | CGG triplet repeat binding protein 1                                                     |
| AF052169         | clone 24775                                                                              |
| Y07593           | coxsackie virus and adenovirus receptor                                                  |
| A1017574         | cysteine-rich protein 1 (intestinal)                                                     |
| A1640861         | dynein, cytoplasmic, light intermediate polypeptide 2                                    |
| X52001           | endothelin 3                                                                             |
| X51956           | ENO2 gene for neuron specific (gamma) enolase                                            |
| M60459           | erythropoietin receptor                                                                  |
| M62400           | gamma-aminobutyric acid receptor type A rho-1 subunit                                    |
| AF062534         | genethonin 1                                                                             |
| M97347           | glucosaminyl (N-acetyl) transferase 1, core 2 (beta-1,6-N-acetylglucosaminyltransferase) |

|          |                                                                                          |
|----------|------------------------------------------------------------------------------------------|
| X76648   | glutaredoxin (thioltransferase)                                                          |
| D86962   | growth factor receptor-bound protein 10                                                  |
| AI200373 | H2A histone family, member I                                                             |
| M11717   | heat shock 70kD protein 1A                                                               |
| M59830   | heat shock 70kD protein 1B                                                               |
| X78565   | hexabrachion (tenascin C, cytotactin)                                                    |
| X92518   | high-mobility group (nonhistone chromosomal) protein isoform I-C                         |
| AA149431 | hypothetical protein DKFZp761F2014                                                       |
| U96922   | inositol polyphosphate-4-phosphatase, type II, 105kD                                     |
| AB006537 | interleukin 1 receptor accessory protein                                                 |
| M28225   | JE gene encoding a monocyte secretory protein                                            |
| AB011109 | KIAA0537 gene product                                                                    |
| AB020676 | KIAA0869 protein                                                                         |
| AJ001684 | killer cell lectin-like receptor subfamily C, member 2 (NKG2C)                           |
| AB023206 | Leman coiled-coil protein                                                                |
| U21128   | lumican                                                                                  |
| D55649   | mannosidase, alpha, class 2A, member 2                                                   |
| L23808   | matrix metalloproteinase 12 (macrophage elastase)                                        |
| U37283   | Microfibril-associated glycoprotein-2                                                    |
| AB018342 | myosin X                                                                                 |
| AI688516 | NADH dehydrogenase (ubiquinone) 1 alpha subcomplex, 2 (8kD, B8)                          |
| X05608   | neurofilament, light polypeptide (68kD)                                                  |
| U97669   | Notch (Drosophila) homolog 3                                                             |
| X12794   | nuclear receptor subfamily 2, group F, member 6                                          |
| U30521   | P311 protein                                                                             |
| AF017786 | phosphatidic acid phosphohydrolase homolog (Dri42)                                       |
| M16750   | pim-1 oncogene                                                                           |
| M21574   | platelet-derived growth factor receptor, alpha polypeptide                               |
| J03278   | platelet-derived growth factor receptor, beta polypeptide                                |
| D64053   | protein tyrosine phosphatase, receptor type, R                                           |
| M14949   | R-ras                                                                                    |
| AI800578 | S-adenosylhomocysteine hydrolase-like 1                                                  |
| Y10032   | serum/glucocorticoid regulated kinase                                                    |
| M26683   | small inducible cytokine A2 (monocyte chemotactic protein 1, homologous to mouse Sig-je) |
| U64197   | small inducible cytokine subfamily A (Cys-Cys), member 20                                |
| AF057164 | solute carrier family 22 (organic cation transporter), member 5                          |
| AF015926 | solute carrier family 9 (sodium/hydrogen exchanger), isoform 3 regulatory factor 1       |
| AF004841 | surface glycoprotein, Ig superfamily member                                              |
| Z48199   | syndecan 1                                                                               |
| AJ006973 | target of myb1 (chicken) homolog                                                         |
| AF050110 | TGFB inducible early growth response                                                     |
| AA704137 | Thy-1 cell surface antigen                                                               |
| M99435   | transducin-like enhancer of split 1, homolog of Drosophila E(sp1)                        |
| X14885   | transforming growth factor, beta 3                                                       |
| D50683   | transforming growth factor, beta receptor II (70-80kD)                                   |
| M77349   | transforming growth factor-beta induced gene product (BIGH3)                             |
| AI743134 | trinucleotide repeat containing 3                                                        |
| M34309   | v-erb-b2 avian erythroblastic leukemia viral oncogene homolog 3                          |

---

**Unique genes regulated by tamoxifen, but not raloxifene**

| <b>Accession number</b> | <b>Gene</b>                                                                      |
|-------------------------|----------------------------------------------------------------------------------|
| D49394                  | 5-hydroxytryptamine receptor 3A                                                  |
| Y10183                  | activated leucocyte cell adhesion molecule                                       |
| K02215                  | angiotensinogen                                                                  |
| D88674                  | antizyme inhibitor                                                               |
| AB004066                | basic helix-loop-helix domain containing, class B, 2                             |
| M90357                  | basic transcription factor 3a                                                    |
| M60314                  | bone morphogenetic protein 5                                                     |
| X60201                  | brain-derived neurotrophic factor                                                |
| AL050089                | bromodomain adjacent to zinc finger domain, 1A                                   |
| AB002803                | BTB and CNC homology 1, basic leucine zipper transcription factor 1              |
| D21255                  | cadherin 11, type 2, OB-cadherin (osteoblast)                                    |
| X51405                  | carboxypeptidase E                                                               |
| AF098641                | CD44 isoform RC                                                                  |
| AL109681                | cDNA clone EUROIMAGE 112333                                                      |
| AI743745                | cDNA clone IMAGE 2368811                                                         |
| AA216639                | cDNA clone IMAGE 649765                                                          |
| AL080192                | cDNA DKFZp434B102                                                                |
| AL049265                | cDNA DKFZp564F053                                                                |
| AL080093                | cDNA DKFZp564N1662                                                               |
| AL080232                | cDNA DKFZp586A061                                                                |
| X05360                  | cell division cycle 2, G1 to S and G2 to M                                       |
| M10905                  | cellular fibronectin (fibronectin 1)                                             |
| AB007972                | chromosome 1 specific transcript KIAA0503                                        |
| AF009426                | chromosome 18 open reading frame 1                                               |
| J02931                  | coagulation factor III (thromboplastin, tissue factor)                           |
| Y15915                  | collagen, type I, alpha 1                                                        |
| X14420                  | collagen, type III, alpha 1 (Ehlers-Danlos syndrome type IV, autosomal dominant) |
| X52022                  | collagen, type VI, alpha 3                                                       |
| J04177                  | collagen, type XI, alpha 1                                                       |
| U46692                  | cystatin B (stefin B)                                                            |
| H87920                  | cytochrome P450, subfamily XXVIA, polypeptide 1                                  |
| U41387                  | DEAD/H (Asp-Glu-Ala-Asp/His) box polypeptide 21                                  |
| AL050024                | DKFZP564D206 protein                                                             |
| AL050190                | DKFZP586B0923 protein                                                            |
| M67439                  | dopamine receptor D5                                                             |
| X68277                  | dual specificity phosphatase 1                                                   |
| U70312                  | EGF-like repeats and discoidin I-like domains 3                                  |
| L25879                  | epoxide hydrolase 1, microsomal (xenobiotic)                                     |
| AI808712                | ESTs                                                                             |
| D10040                  | fatty-acid-Coenzyme A ligase, long-chain 2                                       |
| tigr:HG3044-HT3742      | Fibronectin, Alt. Splice 1                                                       |
| AJ012737                | filamin C, gamma (actin-binding protein-280)                                     |
| AF061034                | FIP2 alternatively translated mRNA                                               |
| tigr:HG1139-HT4910      | Fk506-Binding Protein, Alt. Splice 2                                             |
| AF089750                | flotillin 1                                                                      |
| AF078096                | forkhead box C1                                                                  |
| M69199                  | G0S2 (putative lymphocyte G0/G1 switch gene)                                     |

|          |                                                                                       |
|----------|---------------------------------------------------------------------------------------|
| M60091   | galactose-1-phosphate uridylyltransferase                                             |
| X52947   | gap junction protein, alpha 1, 43kD (connexin 43)                                     |
| M68891   | GATA-binding protein 2                                                                |
| J03060   | glucocerebrosidase                                                                    |
| X03674   | glucose-6-phosphate dehydrogenase                                                     |
| L13698   | growth arrest-specific 1                                                              |
| X03473   | H1 histone family, member 0                                                           |
| AL031781 | homolog of mouse quaking QKI (KH domain RNA binding protein)                          |
| AA675900 | Huntingtin-interacting protein A                                                      |
| AB015331 | hypothetical protein DKFZp434P0116                                                    |
| AA195301 | hypothetical protein MGC2574                                                          |
| S62539   | insulin receptor substrate 1                                                          |
| L27560   | insulin-like growth factor binding protein 5                                          |
| AA477898 | integral membrane protein 2B                                                          |
| M13143   | kallikrein B, plasma (Fletcher factor) 1                                              |
| M26326   | keratin 18                                                                            |
| D31888   | KIAA0071 protein                                                                      |
| D42043   | KIAA0084 protein                                                                      |
| D14659   | KIAA0103 gene product                                                                 |
| D80011   | KIAA0189 gene product                                                                 |
| AB023152 | KIAA0935 protein                                                                      |
| AJ001685 | killer cell lectin-like receptor subfamily C, member 3 (NKG2E)                        |
| X65873   | kinesin family member 5B                                                              |
| AB011105 | laminin, alpha 5                                                                      |
| Z37976   | latent transforming growth factor beta binding protein 2                              |
| AB006780 | lectin, galactoside-binding, soluble, 3 (galectin 3)                                  |
| U69609   | leucine rich repeat (in FLII) interacting protein 1                                   |
| M15856   | lipoprotein lipase                                                                    |
| J05070   | matrix metalloproteinase 9 (gelatinase B, 92kD gelatinase, 92kD type IV collagenase)  |
| U41766   | metalloprotease/disintegrin/cysteine-rich protein precursor                           |
| D14812   | MORF-related gene X                                                                   |
| X15306   | neurofilament, heavy polypeptide (200kD)                                              |
| D83699   | neuronal death protein                                                                |
| AF045451 | NGFI-A binding protein 1 (EGR1 binding protein 1)                                     |
| D16815   | nuclear receptor subfamily 1, group D, member 2                                       |
| X00737   | nucleoside phosphorylase                                                              |
| U60805   | oncostatin M receptor                                                                 |
| M24351   | parathyroid hormone-like protein                                                      |
| D49396   | peroxiredoxin 3                                                                       |
| L20971   | phosphodiesterase 4B, cAMP-specific (dunce (Drosophila)-homolog phosphodiesterase E4) |
| AB006746 | phospholipid scramblase 1                                                             |
| M26167   | platelet factor 4 variant 1                                                           |
| Z54367   | plectin 1, intermediate filament binding protein, 500kD                               |
| M57399   | pleiotrophin (heparin binding growth factor 8, neurite growth-promoting factor 1)     |
| Z29505   | poly(rC)-binding protein 1                                                            |
| D50312   | potassium inwardly-rectifying channel, subfamily J, member 8                          |
| AF006010 | progesterin induced protein                                                           |
| Y07909   | Progression Associated Protein                                                        |
| U47924   | protein "A"                                                                           |
| U09759   | protein kinase (JNK2)                                                                 |

|          |                                                                                        |
|----------|----------------------------------------------------------------------------------------|
| U68111   | protein phosphatase inhibitor 2                                                        |
| M28215   | RAB5A, member RAS oncogene family                                                      |
| AL049538 | ras association (RalGDS/AF-6) domain containing protein JC265                          |
| M23379   | RAS p21 protein activator (GTPase activating protein) 1                                |
| AL043108 | ras-like protein                                                                       |
| AI267373 | regulator of G-protein signalling 4                                                    |
| D84111   | RNA-binding protein gene with multiple splicing                                        |
| Y18264   | sal (Drosophila)-like 1                                                                |
| AB000220 | sema domain, immunoglobulin domain (Ig), short basic domain, secreted, (semaphorin) 3C |
| Y11251   | splicing factor, arginine/serine-rich 2, interacting protein                           |
| Z46629   | SRY (sex determining region Y)-box 9 (campomelic dysplasia, autosomal sex-reversal)    |
| AL022326 | synaptogyrin 1                                                                         |
| AF000652 | syndecan binding protein (syntenin)                                                    |
| L08850   | synuclein, alpha (non A4 component of amyloid precursor)                               |
| M62424   | thrombin (coagulation factor II) receptor                                              |
| X14787   | thrombospondin 1                                                                       |
| D38305   | transducer of ERBB2, 1                                                                 |
| X70340   | transforming growth factor, alpha                                                      |
| M90657   | transmembrane 4 superfamily member 1                                                   |
| D13413   | tumor-associated 120 kDa nuclear protein                                               |
| AF049891 | tyrosylprotein sulfotransferase 2                                                      |
| AF055376 | v-maf musculoaponeurotic fibrosarcoma (avian) oncogene homolog                         |
| V00568   | v-myc avian myelocytomatosis viral oncogene homolog                                    |

---
